# Supplementary material for: Comparison of Insulin Dose Adjustments by Primary Care Physicians and Endocrinologists
Source: Oxford University Press journal article supplement (doi:10.2337/cd17-0021), 2017-10-11

**Supplementary Materials for:**

**Comparison of Insulin Dose Adjustments by Primary Care Physicians and Endocrinologists**

Mayer B. Davidson, Petra Duran, S. Joshua Davidson, and Martin Lee

**Appendix**


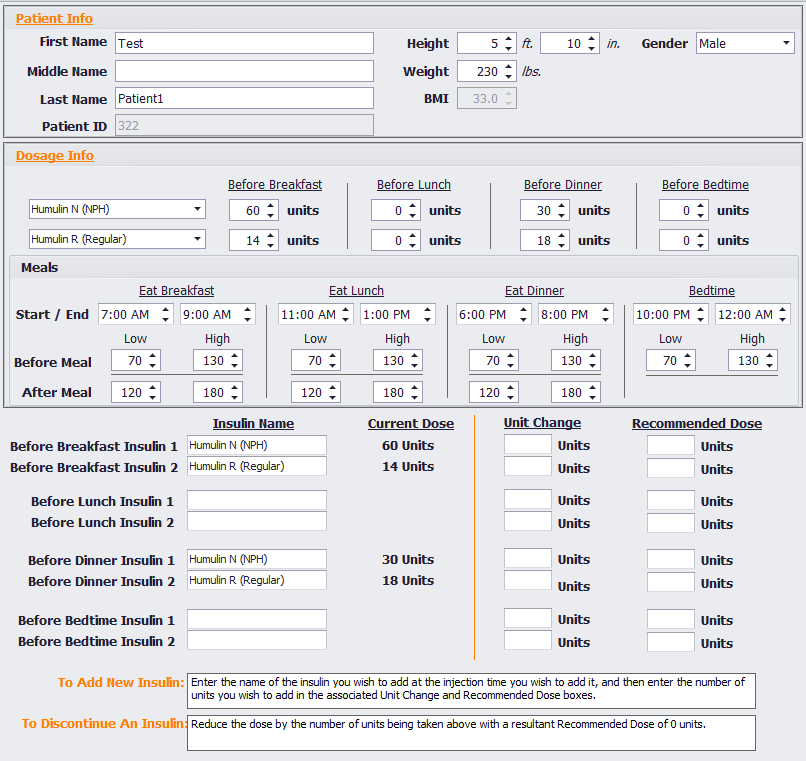


| **Patient 1** | **00:00-01:00** | **01:00-02:00** | **02:00-03:00** | **03:00-04:00** | **04:00-05:00** | **05:00-06:00** | **06:00-07:00** | **07:00-08:00** | **08:00-09:00** | **09:00-10:00** | **10:00-11:00** | **11:00-12:00** | **12:00-13:00** | **13:00-14:00** | **14:00-15:00** | **15:00-16:00** | **16:00-17:00** | **17:00-18:00** | **18:00-19:00** | **19:00-20:00** | **20:00-21:00** | **21:00-22:00** | **22:00-23:00** | **23:00-00:00** |
| --- | --- | --- | --- | --- | --- | --- | --- | --- | --- | --- | --- | --- | --- | --- | --- | --- | --- | --- | --- | --- | --- | --- | --- | --- |
| **10/16/13** |  |  |  |  |  |  | 135 |  |  | 68 |  |  | 88 |  |  | 199 |  |  |  |  |  |  | 229 |  |
| **10/17/13** |  |  |  |  |  |  |  |  |  |  |  |  | 265 |  |  |  |  | 147 |  |  |  |  | 235 |  |
| **10/18/13** |  |  |  | 121 |  |  |  |  |  |  | 69 |  | 43 |  |  |  |  |  |  |  | 133 |  | 201 |  |
| **10/19/13** |  |  |  |  | 125 |  | 117 |  |  |  |  |  | 244 |  |  | 129 |  |  |  |  |  | 161 |  |  |
| **10/20/13** |  |  |  | 120 |  |  | 116 |  |  |  |  |  | 159 |  |  |  |  |  |  |  | 207 |  |  |  |
| **10/21/13** |  |  |  | 138 |  |  | 134 |  |  |  |  |  | 186 |  |  |  |  |  |  |  |  | 214 |  |  |
| **10/22/13** |  |  |  |  |  |  |  |  |  |  |  |  | 196 |  |  |  |  | 172 |  |  |  |  |  |  |
| **10/23/13** |  |  |  |  |  |  | 177 |  |  |  |  |  | 135 |  |  |  |  |  |  |  | 132 |  |  |  |
| **10/24/13** |  |  |  |  |  |  | 152 |  |  |  |  |  | 219 |  |  |  |  |  |  |  | 151 |  |  |  |
| **10/25/13** |  |  |  |  | 128 |  |  |  |  |  |  |  | 178 |  |  |  |  |  | 220 |  |  | 168 |  |  |
| **10/26/13** |  |  |  |  |  | 131 | 138 |  |  |  | 136 |  | 174 |  |  |  |  |  |  |  |  |  |  |  |
| **10/27/13** |  |  |  |  |  |  |  |  |  |  |  |  | 184 |  |  |  |  |  |  |  |  | 168 |  |  |
| **10/28/13** |  |  |  |  |  |  | 112, 96 |  |  |  |  |  | 138 |  |  |  |  |  |  |  |  |  | 165 |  |
| **10/29/13** |  |  |  |  |  |  | 119 |  |  |  |  |  | 256 |  |  |  |  |  |  |  |  |  |  |  |
| **10/30/13** |  |  |  | 54 |  |  | 107 |  |  |  |  |  | 115 |  |  |  |  |  |  |  |  | 172 |  |  |
| **10/31/13** |  |  |  |  | 121 |  |  |  |  |  |  |  | 204 |  |  |  |  |  | 219 |  |  |  | 239 |  |
| **11/1/13** |  |  |  | 171 |  |  |  |  |  |  |  |  |  |  |  |  |  |  |  |  |  |  | 157 |  |
| **11/2/13** |  |  |  |  |  |  | 134 |  |  |  |  | 200 |  |  |  |  |  |  |  |  |  |  | 176 |  |
| **11/3/13** |  |  |  | 121 |  |  |  |  |  |  |  |  |  |  |  |  |  |  |  |  | 174 |  |  |  |
| **11/4/13** |  |  |  |  |  |  | 140 |  |  |  |  |  |  |  | 113 |  |  |  |  |  | 198 |  |  |  |
| **11/5/13** |  |  |  | 128 |  |  |  |  |  |  |  |  |  |  |  |  |  |  |  |  |  | 226 |  |  |
| **11/6/13** |  |  |  |  | 128 |  |  |  |  |  |  | 297 |  |  |  | 130 |  |  |  |  | 224 |  |  |  |
| **11/7/13** |  |  |  |  |  |  |  |  |  | 183, 128 |  | 69 |  |  |  | 206 |  |  |  |  |  | 173 |  |  |
| **11/8/13** |  |  |  |  |  |  |  |  |  | 164 |  | 80 |  |  |  |  |  |  |  |  | 173 |  |  |  |
| **11/9/13** |  |  |  |  |  |  | 130 |  |  |  |  | 195 |  |  |  |  |  |  |  |  | 255 |  |  |  |
| **11/10/13** |  |  |  |  |  |  | 113 |  |  |  |  | 88 |  |  | 132 |  |  |  |  |  | 222 |  |  |  |
| **11/11/13** |  |  |  |  |  |  |  |  |  | 125 |  | 137 |  |  |  | 167 |  | 165 |  |  |  | 207 |  |  |
| **11/12/13** |  |  |  |  |  |  | 110 |  |  | 175 |  |  |  |  | 122 |  |  |  |  |  |  |  |  |  |
| **11/13/13** |  |  |  |  |  |  |  | 96 |  | 61, 173 |  | 126 |  |  |  |  |  |  |  |  |  |  |  |  |
| **11/14/13** |  |  |  |  |  |  |  |  |  |  |  |  |  |  |  |  |  |  |  |  |  |  | 156 |  |
| **11/15/13** |  |  |  |  |  |  |  |  |  |  |  |  |  |  |  |  |  |  |  |  |  |  |  |  |
| **11/16/13** |  |  |  |  |  |  |  |  |  |  |  |  |  |  | 183 |  |  |  |  |  |  |  |  |  |
| **11/17/13** |  |  |  |  |  |  |  |  |  |  |  |  |  |  | 186 |  |  |  |  |  |  |  |  |  |
| **11/18/13** |  |  |  |  |  |  |  |  |  |  |  |  |  |  |  |  |  |  |  |  |  |  |  |  |
| **11/19/13** |  |  |  |  |  |  |  |  |  |  |  |  |  |  | 193 |  |  |  |  |  |  |  |  |  |


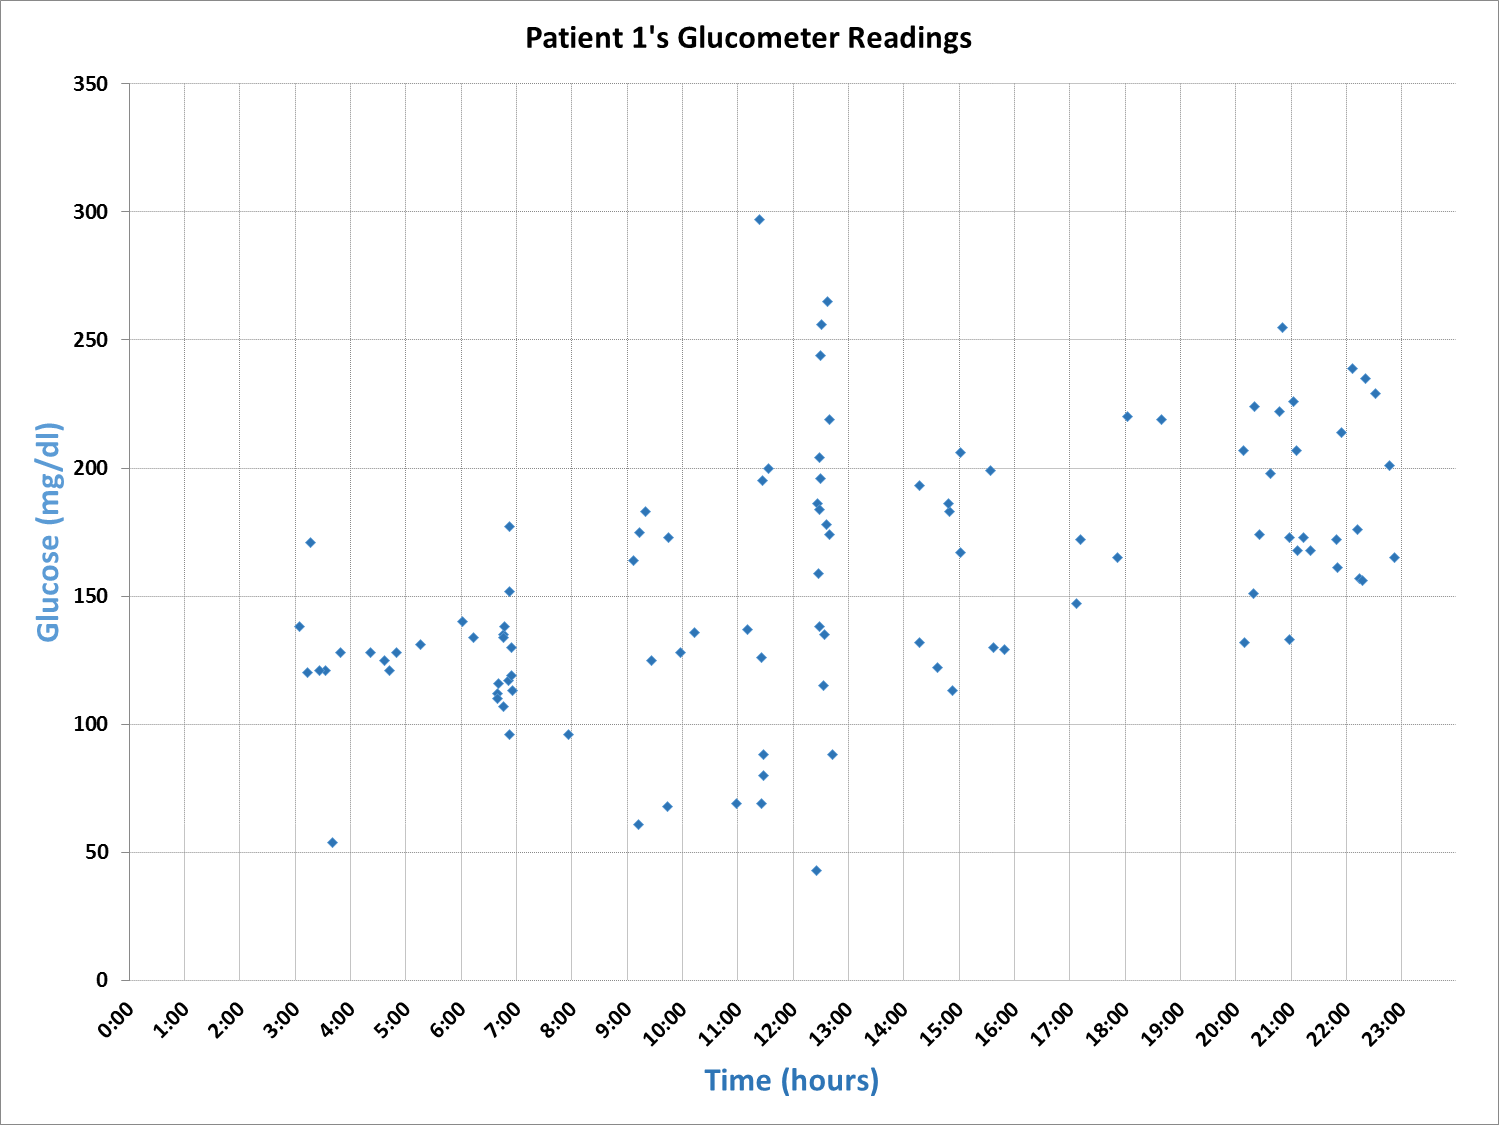

Supplement: cd17-0021_online_only_appendix.doc [file cd17-0021_online_only_appendix.doc]
